# Supplementary material for: The nature of crystal facet effect of TiO2-supported Pd/Pt catalysts on selective hydrogenation of cinnamaldehyde: electron transfer process promoted by interfacial oxygen species
Source: Royal Society of Chemistry journal article supplement (doi:10.1039/d4cp01406e), 2024-01-01
Supplement: d4cp01406e1.pdf [file d4cp01406e1.pdf]

## Supporting information

### Nature of Crystal Facet Effect of TiO<sub>2</sub> Supported Pd/Pt Catalysts on Selective Hydrogenation of Cinnamaldehyde: Electron Transfer Process Promoted by Interfacial Oxygen Species

Jia-Feng Zhou,<sup>a,b</sup> Bo Peng, <sup>\*,a,b</sup> Meng Ding,<sup>a,b</sup> Bing-Qian Shan,<sup>a,b</sup> Yi-Song Zhu,<sup>a,b</sup>  
Laurent Bonneviot,<sup>c</sup> Peng Wu,<sup>a,b,d</sup> Kun Zhang<sup>\*, a,b,d</sup>

<sup>a</sup> State Key Laboratory of Petroleum Molecular & Process Engineering, School of Chemistry and Molecular Engineering, East China Normal University, Shanghai 200062, China;

<sup>b</sup> Shanghai Key Laboratory of Green Chemistry and Chemical Processes, School of Chemistry and Molecular Engineering, East China Normal University, Shanghai 200062, China;;

<sup>c</sup> Laboratoire de Chimie, Ecole Normale Supérieure de Lyon, Institut de Chimie de Lyon, Université de Lyon, 46 Allée d'Italie, Lyon 69364 CEDEX 07, France;

<sup>d</sup> Institute of Eco-Chongming, Shanghai 202162, China;

Bo Peng (BP): Email: [bpeng@chem.ecnu.edu.cn](mailto:bpeng@chem.ecnu.edu.cn); Kun Zhang (KZ): Email: [kzhang@chem.ecnu.edu.cn](mailto:kzhang@chem.ecnu.edu.cn)

#### Experiment section

##### Materials

Chloroplatinic acid (H<sub>2</sub>PtCl<sub>6</sub>, 37 wt% Pt), sodium borohydride (NaBH<sub>4</sub>, 98%), ethanol (EtOH, 99.7%), sodium hydroxide (NaOH, 96%), hydrogen peroxide (H<sub>2</sub>O<sub>2</sub>, 30%), hydrofluoric acid (HF, 40%), tetrabutyl titanate (C<sub>16</sub>H<sub>36</sub>O<sub>4</sub>Ti, 98%) were purchased from Sinopharm (China). P25 were provided by Acros organics. Cinnamyl aldehyde (CAL, 98%) were obtained from Aladdin Industrial Corporation. Lithium chloride anhydrous (LiCl, 99%) were purchased from Macklin. All the chemicals were used without further purification

##### Techniques

The X-ray diffraction (XRD) patterns were required using a Rigaku Ultima Discover X-Ray Diffractometer at a wavelength of Cu K $\alpha$  (1.5405 Å). The TEM images were taken using Hitachi S-4800 microscope and JEOL-JEM-2100 microscope, respectively. FT-IR spectra were recorded by Nicolet Fourier transform infrared spectrometer (NEXUS 670) using the KBr technique. Gas chromatographic mass spectrometry were analyzed and quantified by Agilent HP6890/5973N.

##### Preparation of TiO<sub>2</sub>-101 nanocrystals (bipyramidal TiO<sub>2</sub> nanocrystals)

TiO<sub>2</sub> nanocrystals with different crystal planes exposed are synthesized following Tang et al.'s procedures.<sup>1</sup> The anatase bipyramidal TiO<sub>2</sub> nanocrystals with (101) surface exposed were prepared through two procedures. <sup>2</sup>(1) Synthesis of Na-titanates: 1 g P25 was mixed with 40 ml NaOH (10 mol/L). After being stirred for 10 min at ambient conditions, the reaction solution was transferred to a 50 ml Teflon-lined stainless steel autoclave, kept in an electric oven at 120 °C for 24 h and cooled naturally in air. Afterwards, the white products were collected by centrifugation and washed with deionized water (DI) water for several times until the pH was 10.5. Eventually, the Na-titanates

were isolated by centrifugation at 10000 r/min for 10 min. (2) Preparation of bipyramidal TiO<sub>2</sub> nanoparticles: 3 g Na-titanates (wet without drying after centrifugation step), 0.3932 g LiCl and 120 ml deionized water were added into a 200 ml Teflon-lined stainless steel autoclave after being stirred for 15 min. The autoclave was kept at 200 °C for 4 h and afterwards, cooled naturally in air. The precipitates were collected by centrifugation (10000r/min) and then washed with DI water and ethanol for several times, respectively. Finally, the products were dried in vacuum at 60 °C for 12 h.

#### **Preparation of TiO<sub>2</sub>-100 nanocrystals (TiO<sub>2</sub> nanorods)**

TiO<sub>2</sub> nanocrystals with different crystal planes exposed are synthesized following Tang et al.'s procedures.<sup>1</sup> The Tetragonal faceted-nanorods of anatase TiO<sub>2</sub> with dominant {100} facets have been synthesized by a reported two-step hydrothermal reaction.<sup>3</sup> (1) Synthesis of Na-titanates: 1 g P25 was mixed with 40 ml NaOH (10 mol/L). After being stirred for 10 min at ambient conditions, the reaction solution was transferred to a 50 ml Teflon-lined stainless steel autoclave, kept in an electric oven at 120 °C for 24 h and cooled naturally in air. Afterwards, the white products were collected by centrifugation and washed with deionized water (DI) water for several times until the pH was 10.5. Eventually, the Na-titanates were isolated by centrifugation at 10000 r/min for 10 min. (2) Synthesis of anatase nanorods: 4 g Na-titanates (wet without drying after centrifugation step) was added to 152 ml DI water. And then added 8 ml H<sub>2</sub>O<sub>2</sub>. The mixture was transferred to a 200 ml Teflon-lined stainless steel autoclave after being stirred for 15 min. The autoclave was kept in an oven at 180 °C for 20 h and afterwards, cooled naturally in air. The precipitates were collected by centrifugation (10000r/min) and then washed with DI water and ethanol for several times, respectively. Finally, the products were dried in vacuum at 60 °C for 12 h.

#### **Preparation of TiO<sub>2</sub>-001 nanocrystals (TiO<sub>2</sub> nanosheets)**

TiO<sub>2</sub> nanocrystals with different crystal planes exposed are synthesized following Tang et al.'s procedures.<sup>1</sup> The anatase TiO<sub>2</sub> nanosheets with (001) surface exposed were synthesized through a published hydrothermal route,<sup>4</sup> with HF as the capping agent. Firstly, tetrabutyl titanate (10 mL) and hydrofluoric acid (1.8 mL, 40 wt %) were added into a Telfon-lined autoclave (50 mL) after being stirred for 5 min at ambient conditions and then kept at 200 °C for 20 h. After the reaction, we collected the white precipitates by centrifugation and washed it using deionized water, ethanol and NaOH (1 mol/L) for several times. At last, the samples were dried in vacuum at 60 °C for 12 h.

#### **Synthesis of TiO<sub>2</sub>-101/100/001-Pt-T (T=300, 500, 700°C) catalysts**

H<sub>2</sub>PtCl<sub>6</sub>·6H<sub>2</sub>O aqueous (4 mL, 7.72 mM), 24 mL of ethanol and 0.3 g of TiO<sub>2</sub>-(101)/ (100)/ (001) were mixed together and stirred for 12 h at room temperature, and then 24 mg NaBH<sub>4</sub> was introduced. After stirring 30 min, the suspension was filtered and washed with water and ethanol, and drying at 80°C. After impregnation, the sample were calcinated at 300°C, 500°C and 700°C for 2 h in air. The as-obtained samples were denoted as TiO<sub>2</sub>-(101)/(100)/(001)-Pt-T (T=300, 500, 700°C). The calculated Pt content was 2 wt%.

#### **Synthesis of TiO<sub>2</sub>-101/100/001-Pd-T (T=300, 500, 700°C) catalysts**

K<sub>2</sub>PdCl<sub>6</sub> aqueous (5.64 mL, 10 mM), 24 mL of ethanol and 0.3 g of TiO<sub>2</sub>-(101)/ (100)/ (001)

were mixed together and stirred for 12 h at room temperature, and then 24 mg NaBH<sub>4</sub> was introduced. After stirring 30 min, the suspension was filtered and washed with water and ethanol, and drying at 80°C. After impregnation, the sample were calcinated at 300°C, 500°C and 700°C for 2 h in air. The as-obtained samples were denoted as TiO<sub>2</sub>-(101)/(100)/(001)-Pd-T (T=300, 500, 700°C). The calculated Pd content was 2 wt%.

### Hydrogenation of cinnamaldehyde (CAL)

CAL hydrogenation reactions were performed on the above catalysts in a stainless-steel autoclave reactor. The reaction was carried out at 60 °C and 2.0 MPa H<sub>2</sub> with a certain amount of catalysts in 4 mL of ethanol, 0.4mL of H<sub>2</sub>O, 0.1 mL of CAL and 23 mg catalyst. After the reaction, the reactor was cooled and then slowly depressurized. Finally, the reaction mixture was separated by centrifugation in order to remove the solid catalysts. The reaction products were analyzed and quantified by gas chromatographic mass spectrometry (GC-MS, Agilent HP6890/5973N). The reaction conversion and selectivity were determined by the product analysis.

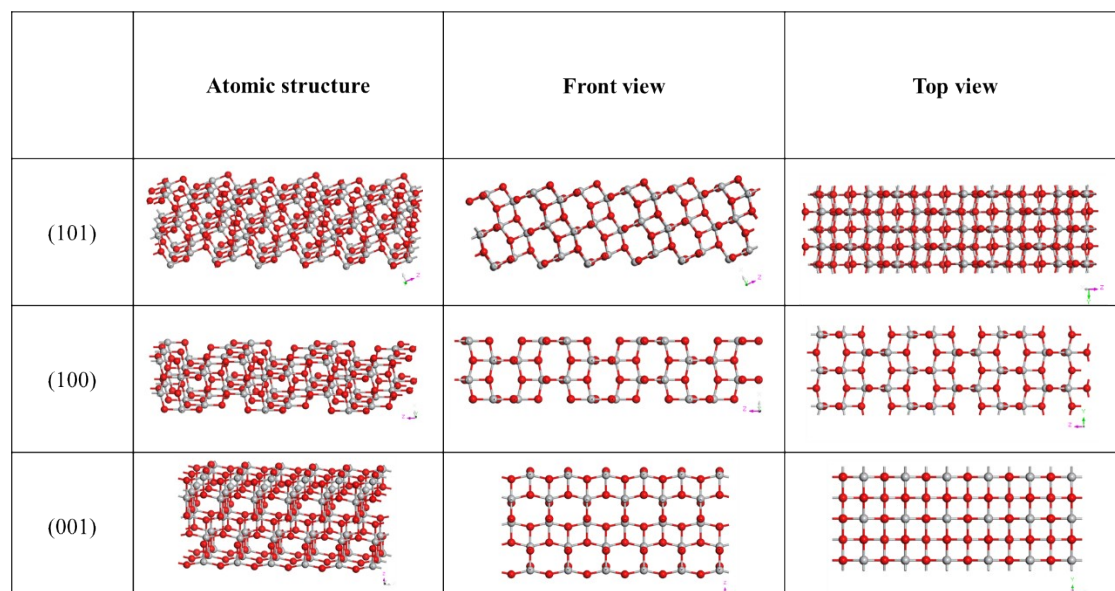

**Figure S1.** Schematics of atomic structure and front view and top view of of anatase TiO<sub>2</sub> (101), (100), and (001) facets.

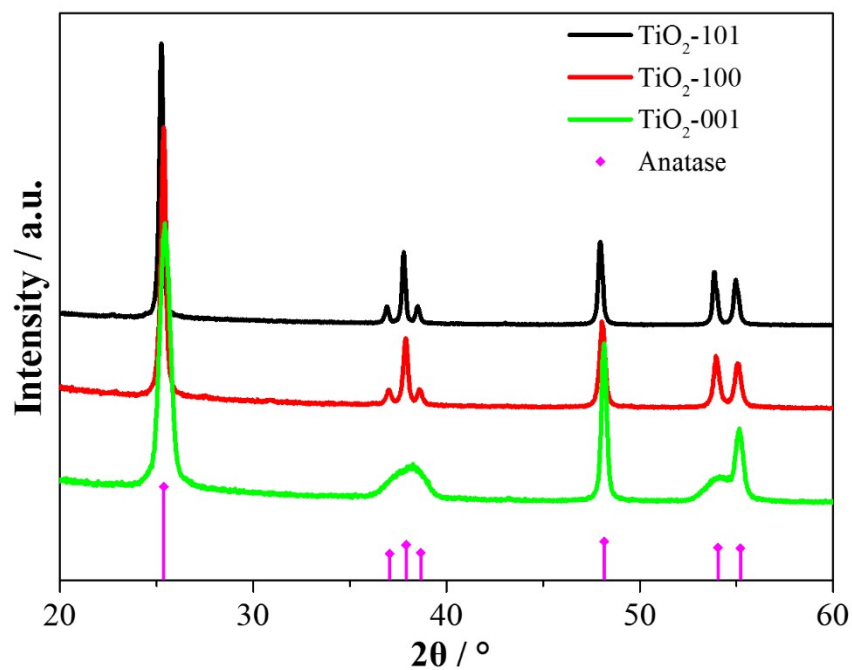

**Figure S2.** XRD patterns of TiO<sub>2</sub>-101 (black), TiO<sub>2</sub>-100 (red), TiO<sub>2</sub>-001 (green).

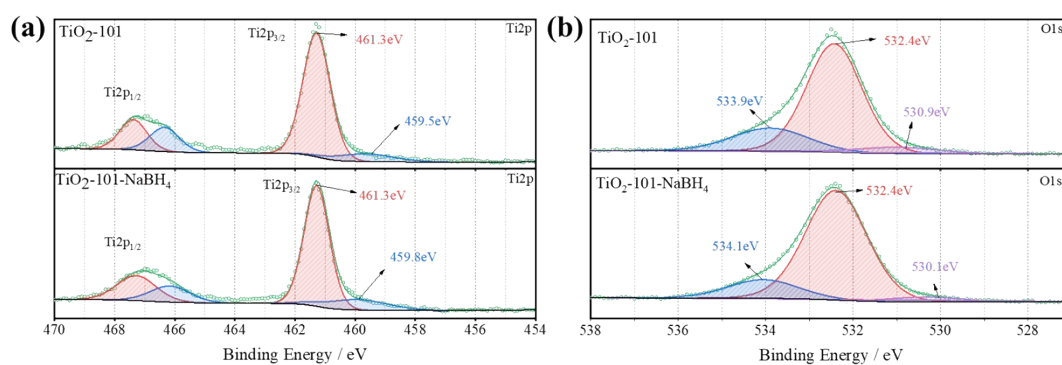

**Figure S3.** The Ti 2p (a) and O 1s (b) spectra of TiO<sub>2</sub>-100 before and after treatment by NaBH<sub>4</sub> reducer.

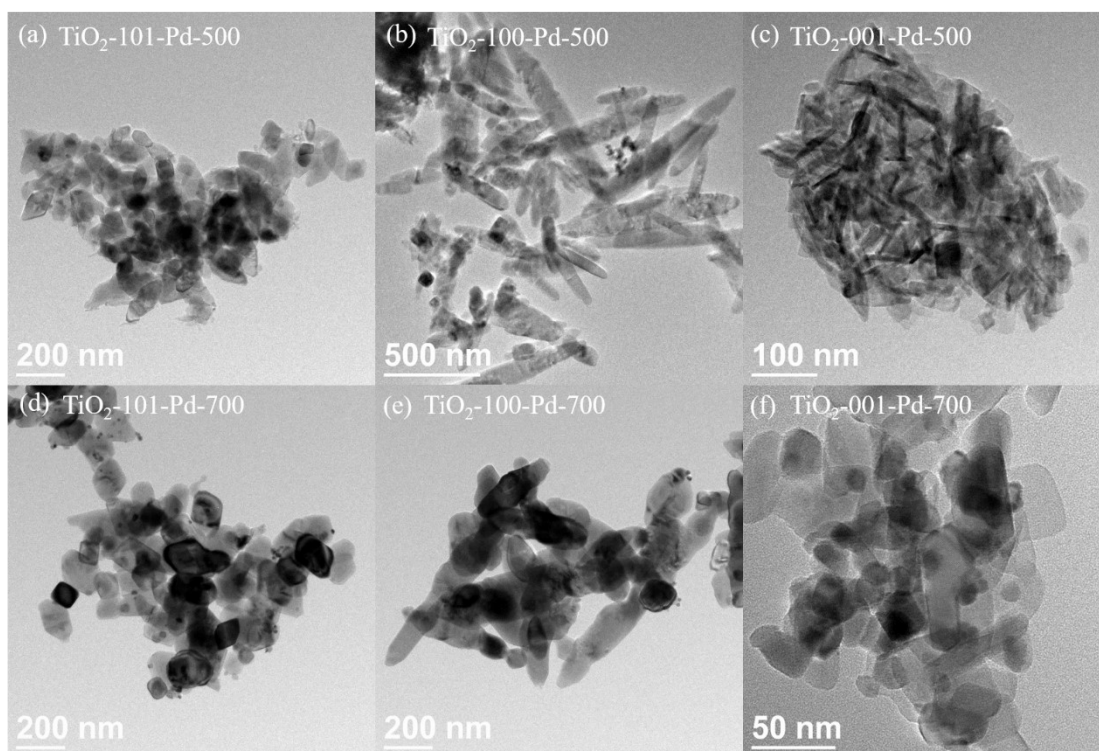

**Figure S4.** TEM images of TiO<sub>2</sub>-101-Pd-500 (a), TiO<sub>2</sub>-100-Pd-500 (b), TiO<sub>2</sub>-001-Pd-500 (c), TiO<sub>2</sub>-101-Pd-700 (d), TiO<sub>2</sub>-100-Pd-700 (e) and TiO<sub>2</sub>-001-Pd-700.

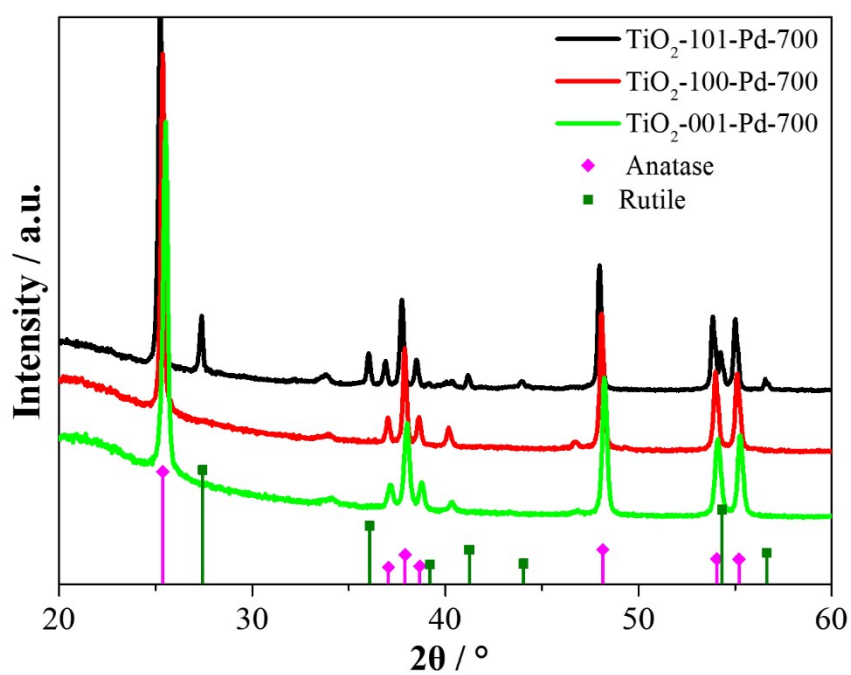

**Figure S5.** XRD patterns of TiO<sub>2</sub>-101-Pd-700-Ar (black), TiO<sub>2</sub>-100-Pd-700-Ar (red), TiO<sub>2</sub>-001-Pd-700-Ar (green).

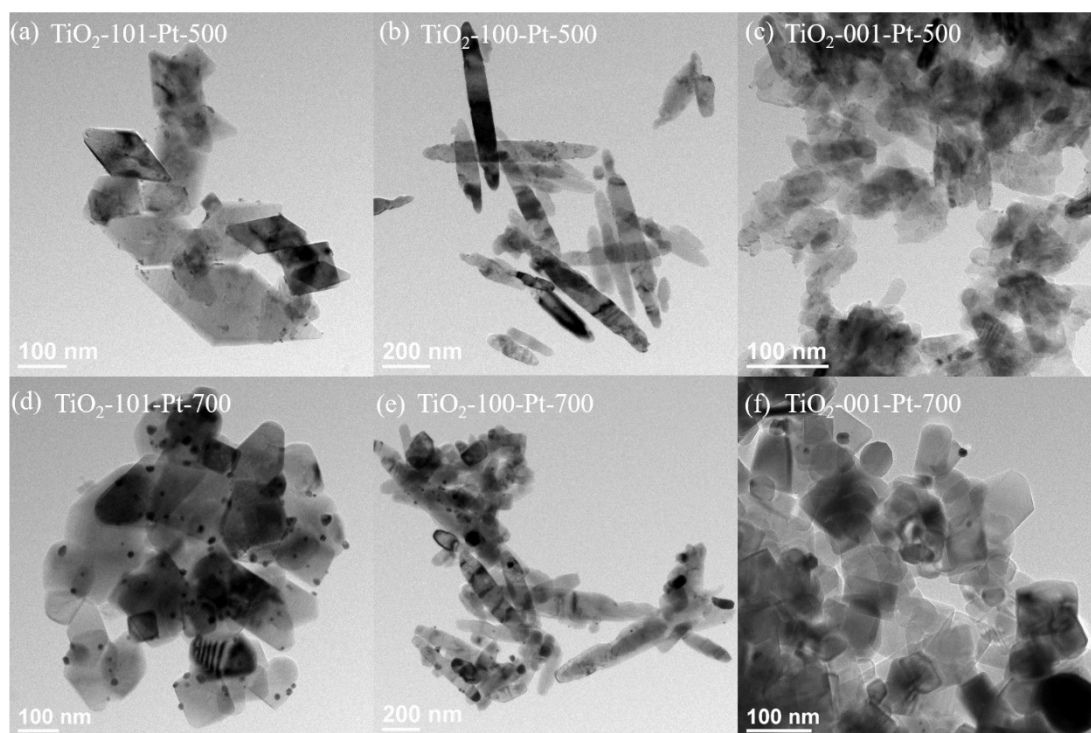

**Figure S6.** TEM images of TiO<sub>2</sub>-101-Pt-500 (a), TiO<sub>2</sub>-100-Pt-500 (b), TiO<sub>2</sub>-001-Pt-500 (c), TiO<sub>2</sub>-101-Pt-700 (d), TiO<sub>2</sub>-100-Pt-700 (e) and TiO<sub>2</sub>-001-Pt-700.

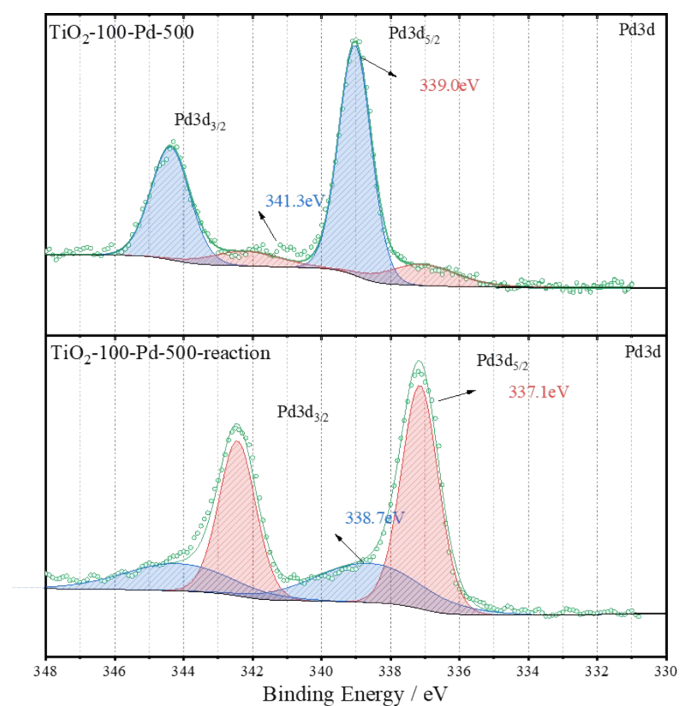

**Figure S7.** (a) The Pd 3d spectra of TiO<sub>2</sub>-100-Pd-500 catalyst before (top) and after hydrogenation reaction (bottom).

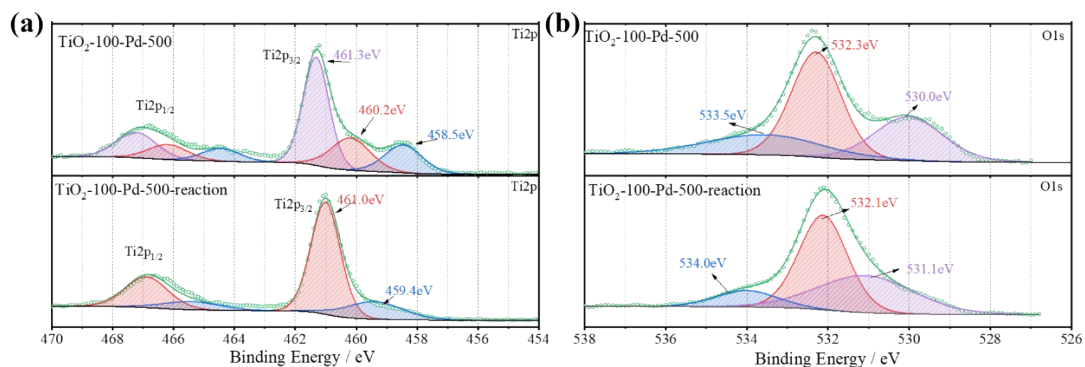

**Figure S8.** The Ti 2*p* (a) and O 1*s* (b) spectra of TiO<sub>2</sub>-100-Pd-500 catalyst before (top) and after hydrogenation reaction (bottom).

## Reference

- [1] Tang, M., Li, S., Chen, S., Ou, Y., Hiroaki, M., Yuan, W., Zhu, B., Yang, H., Gao, Y., Zhang, Z., Wang, Y., Facet-Dependent Oxidative Strong Metal-Support Interactions of Palladium-TiO<sub>2</sub> Determined by In Situ Transmission Electron Microscopy. *Angew. Chem. Int. Ed.* **2021**, *60* (41), 22339-22344.
- [2] Yang, M., Chen, P., Tsai, M., Chen, T., Chang, I. C., Chiu, H., Lee, C., Alkali metal ion assisted synthesis of faceted anatase TiO<sub>2</sub>. *CrystEngComm* **2013**, *15* (15).
- [3] Li, J., Xu, D., Tetragonal faceted-nanorods of anatase TiO<sub>2</sub> single crystals with a large percentage of active {100} facets. *Chem. Commun.* **2010**, *46* (13), 2301-3.
- [4] Han, X., Kuang, Q., Jin, M., Xie, Z., Zheng, L., Synthesis of titania nanosheets with a high percentage of exposed (001) facets and related photocatalytic properties. *J. Am. Chem. Soc.* **2009**, *131* (9), 3152-3153.
